# Supplementary material for: Effects of salinity on photosynthetic traits, ion homeostasis and nitrogen metabolism in wild and cultivated soybean
Source: PeerJ. 2019 Dec 9;7:e8191. doi: 10.7717/peerj.8191 (PMC6907091; doi:10.7717/peerj.8191)
Supplement: Data S1 [file peerj-07-8191-s001.xlsx]

## Sheet: Growth parameters 
	Shoot height			Root length			Shoot FW			Root FW			Shoot DW			Root DW																	Root DW
	Wild soybean	Cultivted soybean		Wild soybean	Cultivted soybean		Wild soybean	Cultivted soybean		Wild soybean	Cultivted soybean		Wild soybean	Cultivted soybean		Wild soybean	Cultivted soybean
CK	85.6	70.9		30	36.8		10.7	43.6		4.2	12.5		1.8	8.6		0.96	2.81																	2
CK	94.6	78.5		31.8	32.3		8.6	32.3		5.1	12.9		3.1	8.3		0.53	2.3																	2.2
CK	92.2	76.6		33.5	30.1		12.7	40.4		2.4	14.5		2.9	7.2		0.61	1.9																	1.9
NS-L	90.3	63		31.5	30.5		9.4	28.6		4.4	11.6		2.58	7.2		0.66	1.985																	1.985
NS-L	83.1	57		33	27.6		10.2	36.2		2.7	12.1		2.184	6.5		0.47	1.573																	1.573
NS-L	85.2	55.9		32.7	31.6		9.6	33.9		4.3	14.4		2.36	6.8		0.583	1.673																	1.673
NS-M	85.25	56.2		34.4	32.9		8.2	32.1		4.1	12.2		2.37	5.2		0.54	1.276																	1.276
NS-M	76.4	50.9		30.9	29.5		10.8	26.8		3.4	11.2		2.2	6.6		0.51	1.603																	0.603
NS-M	88	49.4		31.9	25.7		7.3	29.5		3.6	12.5		2.4	6.7		0.43	2.15																	2.85
NS-H	80.4	52.5		28.9	28.5		8.5	30.8		3.6	10.5		2.5	6.2		0.45	1.425																	1.425
NS-H	79.5	45.5		29.2	30.5		9.1	23.9		3.2	10.6		1.9	4.5		0.64	1.332																	1.332
NS-H	78	49		34.2	27.3		8	28.6		2.9	9.6		2.3	5.5		0.365	1.317																	1.317
AS-L	82.15	56.9		32	32.8		8.5	35.8		3	13		2	5.7		0.451	1.722																	1.722
AS-L	75.4	57.4		26.5	27.2		9.3	28.4		4.3	11.4		2.3	6.5		0.453	1.23																	1.23
AS-L	90	46.9		30.6	28.1		9.6	33.5		3.1	11.6		1.7	5.9		0.586	1.391																	1.891
AS-M	77.4	43.5		29.1	24.3		9.2	30.8		3.7	16		1.8	5.4		0.348	1.38																	1.38
AS-M	73.5	45.5		27.2	23.9		7.3	22.9		2.5	6.3		2.3	5.7		0.545	1.163																	1.263
AS-M	82	50.7		31.1	28.2		7.5	23.6		3.4	7.1		1.6	4.1		0.456	1.161																	1.161
AS-H	72	43		28.5	25.8		6.4	22.9		2.2	4.5		2.021	6.2		0.45	0.9113																	1.613
AS-H	76	33.2		25.6	25.2		11.5	15.2		3.1	7.3		0.896	3.5		0.37	1.031																	1.431
AS-H	74.9	40.1		30.1	22.1		5.1	26.2		2.9	14.8		0.946	4		0.31	0.744																	0.344

## Sheet: Enzymes
		NR			GS			GOGAT			NAD-GDH			NADH-GDH			AspAT			AlaAT
	Treatments	Wild soybean	Cultivted soybean		Wild soybean	Cultivted soybean		Wild soybean	Cultivted soybean		Wild soybean	Cultivted soybean		Wild soybean	Cultivted soybean		Wild soybean	Cultivted soybean		Wild soybean	Cultivted soybean
	CK	2.37208	2.22423		0.921	0.779		6	7		0.899	0.944		17	13		0.0668271	0.0774153		0.0150597	0.0170321
	CK	2.5825	2.302		0.86	0.898		5	8		0.915	1.047		19	13		0.0738431	0.0749965		0.0140558	0.0180101
	CK	2.35917	2.02167		0.867	0.897		6	8		0.969	1.058		18	14		0.0627345	0.0738258		0.0166884	0.0177287
	NS-L	2.70083	2.145		0.791	0.726		6	7		0.987	1.206		22	14		0.084929	0.0718751		0.0219783	0.0201716
	NS-L	2.5375	1.84917		0.874	0.769		6	6		1.121	1.178		24	14		0.0679965	0.0767057		0.0194745	0.0191676
	NS-L	2.51583	1.98917		0.901	0.759		4	6		1.104	1.027		19	15		0.0703351	0.0905061		0.0214476	0.018957
	NS-M	2.48242	1.7025		0.802	0.6		5	6		1.301	1.23		28	16		0.0893367	0.0821834		0.0198292	0.0218942
	NS-M	2.52017	1.92917		0.827	0.677		5	6		1.422	1.09		24	16		0.0761818	0.0910907		0.0225762	0.0217803
	NS-M	2.26583	1.632		0.736	0.699		4	4		1.207	1.201		24	15		0.0691658	0.0826131		0.0225496	0.0192529
	NS-H	2.315	1.37083		0.756	0.582		4	5		1.318	1.362		26	16		0.0903064	0.097846		0.0257415	0.0237488
	NS-H	2.18167	1.48		0.697	0.483		4	4		1.414	1.1263		26	17		0.092014	0.0885508		0.0258803	0.0227389
	NS-H	2.20292	1.59167		0.759	0.466		4	4		1.49	1.205		28	15		0.102784	0.0782281		0.0241681	0.0218272
	AS-L	2.36667	1.96167		0.87	0.784		5	6		0.865	1.062		20	14		0.0821904	0.0744278		0.0182778	0.0182313
	AS-L	2.27083	1.77833		0.793	0.655		4	4		0.979	1.023		19	15		0.0746945	0.0788128		0.0170825	0.0196198
	AS-L	2.40275	1.88958		0.754	0.684		5	4		1.082	0.982		22	13		0.0703351	0.0820284		0.0184476	0.0180967
	AS-M	2.15167	1.585		0.604	0.631		3	5		0.951	1.206		22	16		0.0750125	0.0819054		0.0191399	0.0189047
	AS-M	2.27583	1.42917		0.652	0.566		4	4		1.154	0.97		20	14		0.0811361	0.0932906		0.0183272	0.0189896
	AS-M	1.97083	1.42917		0.63	0.477		4	3		1.15	1.152		22	15		0.0776434	0.0811514		0.0176905	0.020917
	AS-H	1.92083	1.10833		0.612	0.484		3	3		1.204	1.184		22	17		0.0829054	0.0887507		0.0225742	0.021859
	AS-H	1.97917	1.32583		0.545	0.355		3	3		1.128	1.083		24	15		0.0866291	0.0857057		0.0197027	0.0194516
	AS-H	1.87333	1.23167		0.594	0.484		4	3		1.107	1.138		24	16		0.0811514	0.0905061		0.0227121	0.0214754

## Sheet: Photostnthetic pigments
		Chl a			Chl b			Chl a+b			Car
	Teatments	Wild soybean	Cultivted soybean		Wild soybean	Cultivted soybean		Wild soybean	Cultivted soybean		Wild soybean	Cultivted soybean
	CK	15.903	16.7008		4.83713	5.69999		21.603	22.4008		3.43682	3.25664
	CK	16.1216	16.7761		5.09575	6.88921		23.0108	21.6653		3.24893	2.89585
	CK	15.311	16.0294		5.25968	5.51628		20.8273	20.5456		3.2335	3.44637
	NS-L	15.5217	15.7122		4.33718	4.72642		20.2481	20.4386		3.09595	2.75821
	NS-L	16.3793	15.3955		5.15224	3.87053		20.2498	19.266		3.81757	2.94439
	NS-L	15.1591	16.4809		5.00021	4.37621		19.5353	20.8572		3.30432	2.80488
	NS-M	14.7775	13.6141		3.95728	3.60811		18.3856	17.2222		4.30034	1.81605
	NS-M	15.6057	14.86		4.60033	4.02471		19.6304	18.8847		4.12616	3.27895
	NS-M	14.8336	14.0257		5.1078	3.79651		18.6301	17.8223		2.06745	2.12716
	NS-H	14.0874	13.8824		4.46646	3.02721		17.1146	16.9096		5.1326	2.52191
	NS-H	14.8889	13.5843		3.99673	3.99424		18.8832	17.5785		3.1004	2.54461
	NS-H	14.5919	13.6057		4.82517	3.11204		17.7039	16.7178		3.2972	2.60465
	AS-L	15.526	15.1466		3.38974	3.7695		19.2955	18.9161		3.63979	1.77084
	AS-L	14.9341	14.4564		4.82618	3.20699		18.1411	17.6633		2.67636	1.76289
	AS-L	13.8976	15.0874		4.78451	3.213		17.1106	18.3004		2.61826	2.59419
	AS-M	12.5727	11.6379		3.30454	2.07514		14.6478	13.713		2.79548	1.54279
	AS-M	12.9861	11.5709		2.57495	3.37918		16.3653	14.95		2.39278	0.940414
	AS-M	12.9586	11.4599		2.71528	3.60628		16.5648	15.0662		3.59895	2.61413
	AS-H	12.7551	10.6915		2.81046	2.83988		15.595	13.5314		2.09729	0.95882
	AS-H	12.5454	10.5314		2.39124	2.54984		15.0953	13.0812		1.83857	1.58082
	AS-H	12.8754	10.3314		2.05012	1.94289		14.8183	12.2743		1.38551	0.938969

## Sheet: Gasesous exchange parameters
		Pn			Gs			E			WUE			Ci/Ca
	Treatments	Wild soybean	Cultivted soybean		Wild soybean	Cultivted soybean		Wild soybean	Cultivted soybean		Wild soybean	Cultivted soybean		Wild soybean	Cultivted soybean
	CK	12.7	11		1659	1188		10.1	9.6		1.25743	1.14583		0.969617	0.936359
	CK	12.1	11.1		1664	1190		10.6	9.2		1.14151	1.20652		0.969697	0.935214
	CK	12.9	11.1		1688	1124		10.3	9.5		1.25243	1.16842		0.962553	0.933089
	NS-L	12.9	10.5		1660	1148		11.2	9.1		1.15179	1.15385		0.90981	0.834646
	NS-L	12.5	10.6		1687	1173		10.9	9.4		1.14679	1.12766		0.907167	0.898345
	NS-L	12.7	10.5		1695	1278		11.3	9.2		1.12389	1.1413		0.91005	0.938486
	NS-M	12.7	9.8		1795	1122		9.9	8.8		1.28283	1.11364		0.875394	0.79195
	NS-M	12.3	9.6		1711	1135		9.8	8.5		1.2551	1.12941		0.873684	0.789542
	NS-M	13.2	9.6		1795	1198		10.1	8.3		1.30693	1.15663		0.860979	0.799685
	NS-H	13.9	6.8		1880	795		8.8	7.2		1.57955	0.944444		0.83004	0.684609
	NS-H	13.6	6.8		1903	787		9.3	7.1		1.46237	0.957746		0.841938	0.680272
	NS-H	13.9	6.9		1891	798		9.2	6.9		1.51087	1		0.815575	0.688482
	AS-L	11.5	8.4		1464	1130		9.3	8.1		1.23656	1.03704		0.861844	0.829614
	AS-L	11.4	8.6		1492	1147		9.7	8.2		1.17526	1.04878		0.85385	0.835084
	AS-L	11.4	8.3		1477	1120		8.1	7.9		1.40741	1.05063		0.87197	0.843405
	AS-M	9.4	8		1333	664		8.2	4.7		1.14634	1.70213		0.816649	0.760326
	AS-M	9.8	7.4		1389	1010		8.5	8.5		1.15294	0.870588		0.839474	0.736648
	AS-M	9.1	8.4		1472	941		8.6	8.7		1.05814	0.965517		0.827187	0.754617
	AS-H	8.7	5.6		1382	579		8.1	5.2		1.07407	1.07692		0.793358	0.63358
	AS-H	8.5	4.3		1380	582		7.4	5.5		1.14865	0.781818		0.77652	0.630607
	AS-H	7.6	5.5		1398	668		7.2	5.8		1.05556	0.948276		0.768421	0.626984

## Sheet: Cation
		Mn2+			B3+			Fe2+			Cu2+			Zn2+			Na+			Mg2+			Ca2+			K+				P3+
	Treatments	Wild soybean	Cultivted soybean		Wild soybean	Cultivted soybean		Wild soybean	Cultivted soybean		Wild soybean	Cultivted soybean		Wild soybean	Cultivted soybean		Wild soybean	Cultivted soybean		Wild soybean	Cultivted soybean		Wild soybean	Cultivted soybean		Wild soybean	Cultivted soybean			Wild soybean	Cultivted soybean
	CK	0.132172	0.125007		0.328562	0.259722		0.066708	0.072437		0.020752	0.015693		0.111838	0.0985435		10.4468	8.02991		28.4733	24.7184		43.0064	43.3497		201.075	193.562			37.8872	30.4799
	CK	0.101356	0.12083		0.347955	0.306896		0.051957	0.043049		0.0146145	0.0169385		0.122015	0.120356		9.28809	9.11984		26.8328	29.1024		39.1022	45.3791		210.595	196.242			32.7609	30.2749
	CK	0.116764	0.122919		0.338258	0.283309		0.0593325	0.057743		0.0176833	0.0163157		0.116927	0.10945		9.86745	8.57487		27.653	26.9104		41.0543	44.3644		205.835	194.902			35.3241	30.3774
	NS-L	0.101663	0.116881		0.36852	0.308466		0.133871	0.084015		0.025117	0.023194		0.0981365	0.0926185		12.546	8.84636		25.3432	23.7184		36.8004	41.0064		193.491	167.079			32.8053	28.1005
	NS-L	0.117235	0.0980006		0.376981	0.327367		0.132936	0.092305		0.0227255	0.0143635		0.108266	0.0913405		12.5424	11.5991		28.3603	22.8024		37.6511	38.1022		200.209	172.377			30.7153	21.0187
	NS-L	0.109449	0.107441		0.37275	0.317917		0.133404	0.08816		0.0239212	0.0187788		0.103201	0.0919795		12.5442	10.2227		26.8518	23.2604		37.2258	39.5543		196.85	169.728			31.7603	24.5596
	NS-M	0.116265	0.0833855		0.431091	0.375776		0.084704	0.04263		0.019437	0.015267		0.107558	0.0900215		16.2045	10.9464		27.7733	20.7324		35.4416	27.8513		183.722	162.368			28.7416	19.9811
	NS-M	0.0926583	0.095412		0.481547	0.408265		0.090726	0.051251		0.0217343	0.0175885		0.0806585	0.0849155		18.4606	12.5991		24.9328	19.6999		34.5051	32.4319		191.47	157.807			29.1528	20.8716
	NS-M	0.104462	0.0893987		0.456319	0.39202		0.087715	0.0469405		0.0205857	0.0164278		0.094108	0.0874685		17.3325	11.7727		26.353	20.2161		34.9734	30.1416		187.596	160.088			28.9472	20.4263
	NS-H	0.0962701	0.0821175		0.497915	0.387091		0.096417	0.047683		0.0181008	0.014742		0.0710455	0.0620289		22.7484	19.133		22.6015	18.3008		31.5416	28.9004		171.894	120.342			28.2181	17.2132
	NS-H	0.088283	0.083356		0.575707	0.47547		0.065387	0.044562		0.0184795	0.0170695		0.0937915	0.0772092		25.4045	17.176		24.0444	19.2676		33.9051	25.4511		176.189	129.308			26.5471	18.1651
	NS-H	0.0922765	0.0827367		0.536811	0.431281		0.080902	0.0461225		0.0182901	0.0159057		0.0824185	0.0696191		24.0765	18.1545		23.3229	18.7842		32.7234	27.1758		174.041	124.825			27.3826	17.6891
	AS-L	0.0806625	0.082805		0.395776	0.315615		0.244941	0.171736		0.023173	0.021121		0.111968	0.0731965		18.2122	14.8682		22.03	23.8214		33.3497	36.0386		182.072	148.592			28.4416	23.7035
	AS-L	0.120235	0.0961317		0.378265	0.347955		0.066912	0.067139		0.0281035	0.0196385		0.0847785	0.0829465		19.6595	17.2502		25.2765	19.7429		35.3791	38.4929		188.938	155.791			27.3528	23.5348
	AS-L	0.100449	0.0894684		0.38702	0.331785		0.155926	0.119438		0.0256383	0.0203798		0.0983735	0.0780715		18.9359	16.0592		23.6532	21.7821		34.3644	37.2658		185.505	152.192			27.8972	23.6192
	AS-M	0.0814134	0.075265		0.557915	0.395615		0.116714	0.052772		0.022456	0.020374		0.0936185	0.0686885		26.4954	18.7484		22.4594	16.2048		29.5416	26.4051		151.477	115.157			21.7035	18.5208
	AS-M	0.11542	0.075883		0.575707	0.417955		0.083303	0.047036		0.0252305	0.0190612		0.0923405	0.0713093		28.4233	23.4045		20.4431	17.1638		26.9051	21.1039		160.066	120.4			20.5348	17.4902
	AS-M	0.0984167	0.075574		0.566811	0.406785		0.100009	0.049904		0.0238432	0.0197176		0.0929795	0.0699989		27.4593	21.0765		21.4512	16.6843		28.2234	23.7545		155.771	117.778			21.1192	18.0055
	AS-H	0.0710155	0.0493855		0.627915	0.447915		0.074347	0.062131		0.016536	0.0130622		0.0771965	0.0611965		34.3209	24.4954		20.8432	15.5892		23.5416	19.8733		149.261	86.6756			20.4817	15.9181
	AS-H	0.102107	0.072412		0.600571	0.475707		0.080106	0.027755		0.0203415	0.0206425		0.089465	0.0682946		32.5351	26.4233		19.9745	15.3378		27.2051	19.5819		139.084	103.651			17.3293	13.5471
	AS-H	0.0865613	0.0608988		0.614243	0.461811		0.0772265	0.044943		0.0184388	0.0168524		0.0833308	0.0647456		33.428	25.4593		20.4089	15.4635		25.3734	19.7276		144.173	95.1632			18.9055	14.7326

## Sheet: Anions
		NO3-			SO4-2			CL-			H2SO4-			C2O24
	Treatments	Wild soybean	Cultivted soybean		Wild soybean	Cultivted soybean		Wild soybean	Cultivted soybean		Wild soybean	Cultivted soybean		Wild soybean	Cultivted soybean
	CK	10.2018	6.98428		20.1557	23.7615		4.28415	5.22558		2.92932	2.93969		1.11397	1.03388
	CK	6.834	7.56442		22.2202	22.0578		4.07168	5.88213		2.69673	2.93048		1.03084	1.65641
	CK	8.5179	7.27435		21.188	22.9096		4.17791	5.55385		2.81302	2.93508		1.07241	1.34514
	NS-L	8.84183	5.9313		21.8875	22.7615		6.07319	6.62558		2.83425	2.73723		1.22239	1.72603
	NS-L	7.47563	6.99348		23.0114	21.0578		7.82759	6.76213		2.83572	2.87084		1.12461	1.02976
	NS-L	8.15873	6.46239		22.4495	21.9096		6.95039	6.69385		2.83499	2.80403		1.1735	1.3779
	NS-M	7.97563	6.01596		23.6557	18.6961		9.51742	6.60806		2.81535	2.94022		1.21472	1.60825
	NS-M	7.34581	5.9624		23.2202	21.7017		8.80551	7.85347		3.19386	2.41271		1.20408	1.2322
	NS-M	7.66072	5.98918		23.438	20.1989		9.16146	7.23076		3.0046	2.67647		1.2094	1.42022
	NS-H	6.81056	5.76026		24.2202	17.1233		10.6518	8.62347		3.29086	2.62806		1.32496	1.32154
	NS-H	6.58938	4.54183		26.7617	19.5969		10.0196	7.22758		3.07066	2.52186		1.02695	1.51019
	NS-H	6.69997	5.15105		25.491	18.3601		10.3357	7.92552		3.18076	2.57496		1.17595	1.41587
	AS-L	8.20124	5.48519		21.3875	18.6961		5.35284	5.30803		2.83425	2.58755		1.53658	1.43631
	AS-L	6.81011	6.27936		21.6114	24.7017		5.24388	6.74257		2.39589	2.39885		1.28136	1.6416
	AS-L	7.50567	5.88227		21.4995	21.6989		5.29836	6.0253		2.61507	2.4932		1.40897	1.53896
	AS-M	6.78814	4.07204		22.1557	18.1233		5.83527	6.25624		2.69885	2.01512		1.43733	1.74104
	AS-M	6.46041	4.9667		20.0202	19.5969		6.25744	6.29083		2.29769	2.087		1.82385	1.72493
	AS-M	6.62428	4.51937		21.088	18.8601		6.04635	6.27354		2.49827	2.05106		1.63059	1.73299
	AS-H	5.74865	3.62957		18.3425	19.4878		6.97708	6.89307		2.33723	1.80341		2.07525	1.72493
	AS-H	5.36232	3.30578		19.6912	15.1192		6.65268	6.70166		2.27084	1.89641		1.80364	1.93983
	AS-H	5.55549	3.46767		19.0168	17.3035		6.81488	6.79736		2.30403	1.84991		1.93944	1.83238
